# Supplementary material for: Early Castration in Horses Does Not Impact Osteoarticular Metabolism
Source: MDPI journal article supplement (doi:10.3390/ijms242316778), 2023-11-26
Supplement: s1 [file s1]

# Early castration in horses does not impact osteoarticular metabolism

Marion Rouge <sup>1,†</sup>, Florence Legendre <sup>2,†</sup>, Razan Elkhathib <sup>1</sup>, Christelle Delalande <sup>1</sup>, Juliette Cognié <sup>3</sup>, Fabrice Reigner <sup>4</sup>, Philippe Barrière <sup>4</sup>, Stefan Deleuze <sup>5</sup>, Vincent Hanoux <sup>1</sup>, Philippe Galéra <sup>2</sup>, H  l  ne Boura  ma-Lelong <sup>1,\*</sup>

**A**

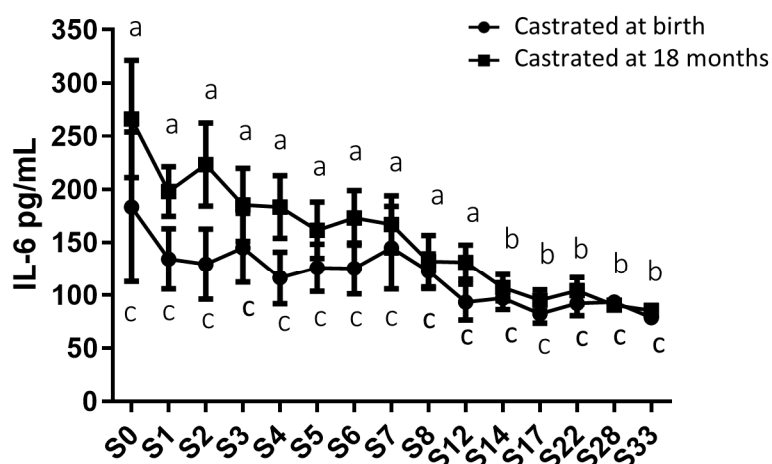

**B**

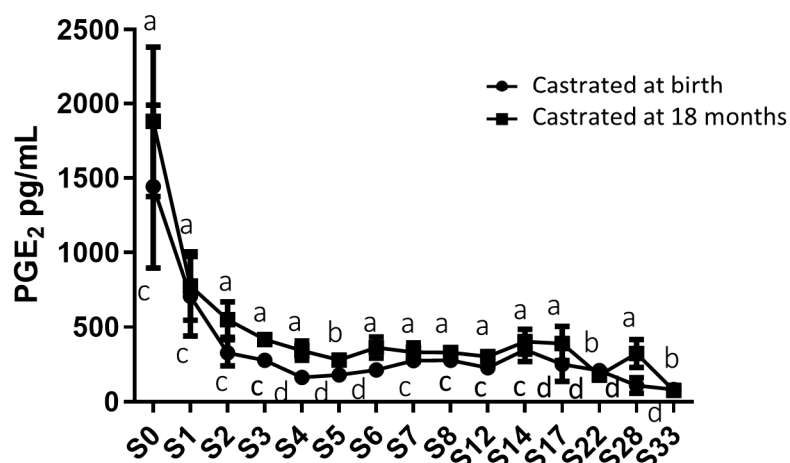

**Figure S1.** Circulating levels of inflammatory biomarkers in plasma samples from horses castrated at birth and at 18 months. Plasma levels of IL-6 (A) and PGE<sub>2</sub> (B) were measured for 33 months after birth in the two experimental groups using ELISA (S0 to S12: n=11, S14 to S17: n=8, S28 to S33: n=5). Data are presented as mean  $\pm$  SEM. A variation analysis in the biomarker levels compared to P0 within the same group was performed with a Kruskal-Wallis test followed by a Dunn's comparison (a  $\neq$  b; c  $\neq$  d). A Mann-Witney test was compared to compare the biomarker levels at the same time between the two groups, and no differences were observed.
